# Supplementary material for: Efficacy and Safety of Intra-articular Injections of Hyaluronic Acid Combined With Polydeoxyribonucleotide in the Treatment of Knee Osteoarthritis
Source: PubMed Central journal article supplement — Ann Rehabil Med. 2019 Apr 30;43(2):204–14. doi: 10.5535/arm.2019.43.2.204 (PMC6509584; doi:10.5535/arm.2019.43.2.204), 2019-04-30
Supplement: arm-2019-43-2-204-app1.pdf [file arm-2019-43-2-204-app1.pdf]

Appendix 1. Western Ontario and McMaster Universities Osteoarthritis Index (WOMAC)

**The Western Ontario and McMaster Universities Osteoarthritis Index (WOMAC)**

Name \_\_\_\_\_ Date of Birth \_\_\_\_\_ Today's Date \_\_\_\_\_

Height \_\_\_\_\_ ft. \_\_\_\_\_ in. Weight \_\_\_\_\_ lbs.

Instructions: Please rate the activities in each category according to the following scale of difficulty:  
 0 = None, 1 = Slight, 2 = Moderate, 3 = Very, 4 = Extremely Circle one number for each activity

|                   |                                         |                            |                            |                            |                            |                            |
|-------------------|-----------------------------------------|----------------------------|----------------------------|----------------------------|----------------------------|----------------------------|
| Pain              | 1. Walking                              | <input type="checkbox"/> 0 | <input type="checkbox"/> 1 | <input type="checkbox"/> 2 | <input type="checkbox"/> 3 | <input type="checkbox"/> 4 |
|                   | 2. Stair Climbing                       | <input type="checkbox"/> 0 | <input type="checkbox"/> 1 | <input type="checkbox"/> 2 | <input type="checkbox"/> 3 | <input type="checkbox"/> 4 |
|                   | 3. Nocturnal                            | <input type="checkbox"/> 0 | <input type="checkbox"/> 1 | <input type="checkbox"/> 2 | <input type="checkbox"/> 3 | <input type="checkbox"/> 4 |
|                   | 4. Rest                                 | <input type="checkbox"/> 0 | <input type="checkbox"/> 1 | <input type="checkbox"/> 2 | <input type="checkbox"/> 3 | <input type="checkbox"/> 4 |
|                   | 5. Weight bearing                       | <input type="checkbox"/> 0 | <input type="checkbox"/> 1 | <input type="checkbox"/> 2 | <input type="checkbox"/> 3 | <input type="checkbox"/> 4 |
| Stiffness         | 1. Morning stiffness                    | <input type="checkbox"/> 0 | <input type="checkbox"/> 1 | <input type="checkbox"/> 2 | <input type="checkbox"/> 3 | <input type="checkbox"/> 4 |
|                   | 2. Stiffness occurring later in the day | <input type="checkbox"/> 0 | <input type="checkbox"/> 1 | <input type="checkbox"/> 2 | <input type="checkbox"/> 3 | <input type="checkbox"/> 4 |
| Physical Function | 1. Descending stairs                    | <input type="checkbox"/> 0 | <input type="checkbox"/> 1 | <input type="checkbox"/> 2 | <input type="checkbox"/> 3 | <input type="checkbox"/> 4 |
|                   | 2. Ascending stairs                     | <input type="checkbox"/> 0 | <input type="checkbox"/> 1 | <input type="checkbox"/> 2 | <input type="checkbox"/> 3 | <input type="checkbox"/> 4 |
|                   | 3. Rising from sitting                  | <input type="checkbox"/> 0 | <input type="checkbox"/> 1 | <input type="checkbox"/> 2 | <input type="checkbox"/> 3 | <input type="checkbox"/> 4 |
|                   | 4. Standing                             | <input type="checkbox"/> 0 | <input type="checkbox"/> 1 | <input type="checkbox"/> 2 | <input type="checkbox"/> 3 | <input type="checkbox"/> 4 |
|                   | 5. Bending to floor                     | <input type="checkbox"/> 0 | <input type="checkbox"/> 1 | <input type="checkbox"/> 2 | <input type="checkbox"/> 3 | <input type="checkbox"/> 4 |
|                   | 6. Walking on flat surface              | <input type="checkbox"/> 0 | <input type="checkbox"/> 1 | <input type="checkbox"/> 2 | <input type="checkbox"/> 3 | <input type="checkbox"/> 4 |
|                   | 7. Getting in / out of car              | <input type="checkbox"/> 0 | <input type="checkbox"/> 1 | <input type="checkbox"/> 2 | <input type="checkbox"/> 3 | <input type="checkbox"/> 4 |
|                   | 8. Going shopping                       | <input type="checkbox"/> 0 | <input type="checkbox"/> 1 | <input type="checkbox"/> 2 | <input type="checkbox"/> 3 | <input type="checkbox"/> 4 |
|                   | 9. Putting on socks                     | <input type="checkbox"/> 0 | <input type="checkbox"/> 1 | <input type="checkbox"/> 2 | <input type="checkbox"/> 3 | <input type="checkbox"/> 4 |
|                   | 10. Lying in bed                        | <input type="checkbox"/> 0 | <input type="checkbox"/> 1 | <input type="checkbox"/> 2 | <input type="checkbox"/> 3 | <input type="checkbox"/> 4 |
|                   | 11. Taking off socks                    | <input type="checkbox"/> 0 | <input type="checkbox"/> 1 | <input type="checkbox"/> 2 | <input type="checkbox"/> 3 | <input type="checkbox"/> 4 |
|                   | 12. Rising from bed                     | <input type="checkbox"/> 0 | <input type="checkbox"/> 1 | <input type="checkbox"/> 2 | <input type="checkbox"/> 3 | <input type="checkbox"/> 4 |
|                   | 13. Getting in/out of bath              | <input type="checkbox"/> 0 | <input type="checkbox"/> 1 | <input type="checkbox"/> 2 | <input type="checkbox"/> 3 | <input type="checkbox"/> 4 |
|                   | 14. Sitting                             | <input type="checkbox"/> 0 | <input type="checkbox"/> 1 | <input type="checkbox"/> 2 | <input type="checkbox"/> 3 | <input type="checkbox"/> 4 |
|                   | 15. Getting on/off toilet               | <input type="checkbox"/> 0 | <input type="checkbox"/> 1 | <input type="checkbox"/> 2 | <input type="checkbox"/> 3 | <input type="checkbox"/> 4 |
|                   | 16. Heavy domestic duties               | <input type="checkbox"/> 0 | <input type="checkbox"/> 1 | <input type="checkbox"/> 2 | <input type="checkbox"/> 3 | <input type="checkbox"/> 4 |
|                   | 17. Light domestic duties               | <input type="checkbox"/> 0 | <input type="checkbox"/> 1 | <input type="checkbox"/> 2 | <input type="checkbox"/> 3 | <input type="checkbox"/> 4 |

Total Score: \_\_\_\_\_ / 96 = \_\_\_\_\_%

The WOMAC is a self-administered questionnaire that is composed of 24 questions categorized into three subscales (pain, stiffness, and physical function).
