# Supplementary material for: Efficacy and Safety of Intra-articular Injections of Hyaluronic Acid Combined With Polydeoxyribonucleotide in the Treatment of Knee Osteoarthritis
Source: PubMed Central journal article supplement — Ann Rehabil Med. 2019 Apr 30;43(2):204–14. doi: 10.5535/arm.2019.43.2.204 (PMC6509584; doi:10.5535/arm.2019.43.2.204), 2019-04-30
Supplement: arm-2019-43-2-204-app2.pdf [file arm-2019-43-2-204-app2.pdf]

Appendix 2. The 2011 Knee Society Scores (KSS)

**5940547318**

Page 1/7

### KNEE SOCIETY SCORE: POST-OP

**DEMOGRAPHIC INFORMATION (To be completed by patient)**

**1- Today's date**  /  /  Enter dates as: mm/dd/yyyy

**2- Date of birth**  /  /

**3- Height (ft' in")**  /

**4- Weight (lbs.)**

**5- Sex**  Male  Female

**6- Side of this (surgically treated) knee**  Left  Right If both knees have been operated on, please use a different form for each knee

**7- Ethnicity**

Native Hawaiian or other Pacific Islander  American Indian or Alaska Native  Hispanic or Latino

Arab or Middle Eastern  African American or Black  Asian  White

**8- Please indicate date and surgeon for your knee replacement operation**

**Date**  /  /  Enter dates as: mm/dd/yyyy **Name of Surgeon**

**9- Was this a primary or revision knee replacement?**  Primary  Revision

**To be completed by surgeon**

**10- Charnley Functional Classification (Use Code Below)**

A Unilateral Knee Arthritis                      C1 TKR, but remote arthritis affecting ambulation

B1 Unilateral TKA, opposite knee arthritic    C2 TKR, but medical condition affecting ambulation

B2 Bilateral TKA                                      C3 Unilateral or Bilateral TKA with Unilateral or Bilateral THR

© 2011 by The Knee Society. All rights reserved. No part of this document may be reproduced or transmitted in any form or by any means, electronic, mechanical, photocopying, recording, or otherwise, without prior written permission of The Knee Society.

The 2011 KSS consists of four subscales: (A) objective knee scores (7 items, 100 points); (B) symptom scores (3 items, 25 points); (C) patient satisfaction scores (5 items, 40 points); and (D) functional activity scores (19 items, 100 points).
